# Supplementary material
Source: PubMed Central journal article supplement (PMC4493880)
Supplement: chest_148_1_79_ds01.pdf [file chest_148_1_79_ds01.pdf]

# The Volume-Outcome Relationship in Critical Care A Systematic Review and Meta-analysis

Yên-Lan Nguyen, MD, MPH; David J. Wallace, MD, MPH; Youri Yordanov, MD;  
Ludovic Trinquart, PhD; Josefin Blomkwist, MSc; Derek C. Angus, MD, MPH, FCCP;  
Jeremy M. Kahn, MD; Philippe Ravaud, MD, PhD; and Bertrand Guidet, MD

CHEST 2015; 148(1):79-92

## e-Appendix 1. Search algorithm on Medline and EMBASE:

| <b>MEDLINE (PubMed)</b>        |                                                                                                                                                                                                                                                                                                                                                                                                                                                                             |
|--------------------------------|-----------------------------------------------------------------------------------------------------------------------------------------------------------------------------------------------------------------------------------------------------------------------------------------------------------------------------------------------------------------------------------------------------------------------------------------------------------------------------|
| 1. population                  | ("intensive care units" [Mesh] OR "critical care" [MesH] OR "critical illness" [MesH] OR "intensive care"[tiab] OR "critically ill"[tiab] OR "critical care"[tiab] OR "ICU"[tiab] OR "critical illness"[tiab] OR "acute" [tiab])                                                                                                                                                                                                                                            |
| 2. outcome                     | ("mortality"[MesH] OR outcome[tiab] OR mortality[tiab] OR survival[tiab] OR death[tiab])                                                                                                                                                                                                                                                                                                                                                                                    |
| 3. volume                      | (volume[tiab] NOT tidal[tiab] NOT hemodialysis[tiab] NOT stroke[tiab] NOT lung[tiab] NOT pressure[tiab] NOT ventricule[tiab] NOT gastric[tiab] NOT platelet[tiab] NOT blood[tiab] NOT brain[tiab] NOT hematoma[tiab] NOT hemofiltration[tiab])                                                                                                                                                                                                                              |
| Search equation: 1 AND 2 AND 3 |                                                                                                                                                                                                                                                                                                                                                                                                                                                                             |
| <b>EMBASE</b>                  |                                                                                                                                                                                                                                                                                                                                                                                                                                                                             |
| 1. population                  | ('intensive care'/exp OR 'intensive care':ti,ab OR 'critically ill'/exp OR 'critically ill':ti,ab OR 'critical care'/exp OR 'critical care':ti,ab OR 'critical illness'/exp OR 'critical illness':ti,ab OR 'acute':ti,ab)                                                                                                                                                                                                                                                   |
| 2. volume                      | (Volume:ti,ab NOT tidal:ti,ab NOT (hemodialysis:ti,ab OR 'hemodialysis'/exp) NOT ('stroke':ti,ab OR 'stroke'/exp) NOT (lung:ti,ab OR 'lung'/exp) NOT (pressure:ti,ab OR 'pressure'/exp) NOT (ventricule:ti,ab OR 'ventricule'/exp) NOT (gastric:ti,ab OR 'gastric'/exp) NOT (platelet:ti,ab OR 'platelet'/exp) NOT (blood:ti,ab OR 'blood'/exp) NOT (brain:ti,ab OR 'brain'/exp) NOT (hematoma:ti,ab or 'hematoma'/exp) NOT (hemofiltration:ti,ab OR 'hemofiltration'/exp)) |
| 3. outcome                     | Outcome:ti,ab OR mortality:ti,ab OR 'mortality'/exp OR survival:ti,ab OR 'survival'/exp OR death:ti,ab                                                                                                                                                                                                                                                                                                                                                                      |
| Search equation: 1 AND 2 AND 3 |                                                                                                                                                                                                                                                                                                                                                                                                                                                                             |

*Online supplements are not copyedited prior to posting.*

**e-Table 1: Risk adjustments**

| Source                        | Positive ? | Adjusted for Hospital characteristics |                       |                     |                           |      |                          | Adjusted for ICU characteristics |                      |                        |       |
|-------------------------------|------------|---------------------------------------|-----------------------|---------------------|---------------------------|------|--------------------------|----------------------------------|----------------------|------------------------|-------|
|                               |            | Teaching status                       | Geographical position | Technology capacity | Trauma center designation | Size | Other                    | ICU type                         | High intensity model | Nurse-to-patient ratio | Other |
| Ananthakrishnan et. al., 2008 | No         | Yes                                   | Yes                   | No                  | No                        | No   | No                       | No                               | No                   | No                     | No    |
| Callaway et. al., 2010        | No         | Yes                                   | No                    | Yes                 | Yes                       | No   | No                       | No                               | No                   | No                     | No    |
| Carr et. al., 2009            | Yes        | No                                    | No                    | No                  | No                        | No   | No                       | No                               | No                   | No                     | No    |
| Chen et. al., 2003            | Yes        | No                                    | No                    | Yes                 | No                        | Yes  | No                       | No                               | No                   | No                     | No    |
| Chul Cha et al. 2012          | Yes        | No                                    | Yes                   | No                  | No                        | No   | No                       | No                               | No                   | No                     | No    |
| Cooke et. al., 2012           | No         | Yes                                   | Yes                   | No                  | No                        | Yes  | Yes (ICU hospital level) | No                               | No                   | No                     | No    |
| Cross et. al., 2003           | Yes        | No                                    | No                    | No                  | No                        | No   | No                       | No                               | No                   | No                     | No    |
| Cudnick et al.; 2012          | No         | Yes                                   | No                    | Yes                 | Yes                       | No   | Yes (hospital volume)    | No                               | No                   | No                     | No    |
| Darmon et. al., 2011          | Yes        | No                                    | No                    | No                  | No                        | No   | No                       | No                               | No                   | No                     | No    |
| Dimick et. al., 2002          | No         | No                                    | No                    | No                  | No                        | No   | No                       | No                               | Yes                  | No                     | No    |
| Dimick et. al., 2003          | Yes        | No                                    | No                    | No                  | No                        | No   | No                       | No                               | No                   | No                     | No    |
| Durairaj et. al., 2005        | No         | No                                    | No                    | No                  | No                        | No   | No                       | No                               | No                   | No                     | No    |
| Durairaj et. al., 2005        | No         | No                                    | No                    | No                  | No                        | No   | No                       | No                               | No                   | No                     | No    |
| Durairaj et. al., 2005        | No         | No                                    | No                    | No                  | No                        | No   | No                       | No                               | No                   | No                     | No    |
| Giles et. al., 2009           | Yes        | No                                    | No                    | No                  | No                        | No   | No                       | No                               | No                   | No                     | No    |
| Glance et. al., 2006          | No         | No                                    | No                    | No                  | No                        | No   | No                       | Yes                              | Yes                  | Yes                    | No    |
| Gopal et. al., 2011           | No         | No                                    | No                    | No                  | No                        | No   | No                       | No                               | No                   | No                     | No    |
| Joseph et. al., 2009          | No         | Yes                                   | No                    | No                  | No                        | No   | No                       | No                               | No                   | No                     | No    |
| Kahn et. al.,                 | Yes        | No                                    | No                    | No                  | No                        | No   | No                       | Yes                              | Yes                  | No                     | No    |

*Online supplements are not copyedited prior to posting.*



|                          |     |     |     |     |    |     |                                    |     |    |     |     |                                         |
|--------------------------|-----|-----|-----|-----|----|-----|------------------------------------|-----|----|-----|-----|-----------------------------------------|
| 2006                     |     |     |     |     |    |     |                                    |     |    |     |     |                                         |
| Kahn et. al., 2009       | Yes | No  | No  | Yes | No | No  | No                                 | No  | No | No  | No  | No                                      |
| Knipp et. al., 2007      | Yes | Yes | No  | No  | No | No  | No                                 | No  | No | No  | No  | No                                      |
| Kuo et. al., 2001        | Yes | No  | No  | No  | No | No  | No                                 | No  | No | No  | No  | No                                      |
| Lecuyer et. al., 2008    | Yes | No  | No  | No  | No | No  | No                                 | No  | No | No  | No  | No                                      |
| Lin et. al., 2008        | Yes | Yes | No  | No  | No | Yes | No                                 | No  | No | No  | No  | Yes (Intensivist characteristics)       |
| Macomber et al.; 2012    | Yes | No  | No  | No  | No | No  | No                                 | No  | No | No  | No  | No                                      |
| Metnitz et. al., 2009    | Yes | No  | No  | No  | No | No  | No                                 | No  | No | No  | No  | No                                      |
| Moran et al., 2012       | No  | No  | No  | No  | No | No  | No                                 | No  | No | No  | No  | Yes (ICU level)                         |
| Needham et. al., 2006    | No  | No  | Yes | No  | No | No  | No                                 | No  | No | No  | No  | No                                      |
| Nguyen et. al., 2011     | No  | Yes | Yes | No  | No | No  | No                                 | Yes | No | No  | No  | No                                      |
| Nguyen et. al., 2011     | No  | Yes | Yes | No  | No | No  | No                                 | Yes | No | No  | No  | No                                      |
| Nuno et al.; 2012        | Yes | No  | No  | No  | No | No  | No                                 | No  | No | No  | No  | No                                      |
| Peelen et. al., 2007     | Yes | Yes | No  | No  | No | Yes | Yes (presence of a step down unit) | No  | No | Yes | Yes | Yes (ICU size, Intensivist per ICU bed) |
| Powell et. al., 2010     | Yes | Yes | Yes | No  | No | Yes | No                                 | No  | No | No  | No  | No                                      |
| Shahin et al. 2012       | No  | Yes | No  | No  | No | No  | No                                 | No  | No | No  | No  | No                                      |
| Shin et. al., 2011       | Yes | No  | No  | No  | No | No  | Yes (ED level)                     | No  | No | No  | No  | No                                      |
| Stub et. al., 2011       | No  | No  | No  | Yes | No | No  | Yes (admission hours)              | No  | No | No  | No  | No                                      |
| Sun Ro Youg et al.; 2012 | Yes | No  | Yes | No  | No | No  | Yes (ED level)                     | No  | No | No  | No  | No                                      |
| Vaara et al.; 2012       | Yes | No  | No  | No  | No | No  | No                                 | No  | No | No  | No  | No                                      |
| Zuber et. al., 2012      | Yes | No  | No  | No  | No | No  | No                                 | No  | No | No  | No  | No                                      |
| Banta et al. 2012        | Yes | Yes | Yes | No  | No | Yes | Yes (ownership)                    | No  | No | No  | No  | No                                      |

*Online supplements are not copyedited prior to posting.*



|                       |     |     |     |    |    |     |                        |    |     |    |    |
|-----------------------|-----|-----|-----|----|----|-----|------------------------|----|-----|----|----|
| Shen et al. 2012      | Yes | No  | Yes | No | No | Yes | p)<br>Yes<br>(ownershi | No | No  | No | No |
| Dres et al. 2013      | Yes | No  | No  | No | No | No  | p)<br>No               | No | No  | No | No |
| Fernandez et al. 2013 | Yes | No  | No  | No | No | No  | No                     | No | No  | No | No |
| Shahin et al. 2014    | Yes | Yes | No  | No | No | No  | No                     | No | No  | No | No |
| Walkey et al. 2014    | Yes | Yes | Yes | No | No | Yes | Yes<br>(transfer)      | No | Yes | No | No |

*Online supplements are not copyedited prior to posting.*
